# Supplementary material
Source: publisher figshare collection journal article supplement (https://aacr.figshare.com/articles/dataset/_/22469906)

# Figure S4

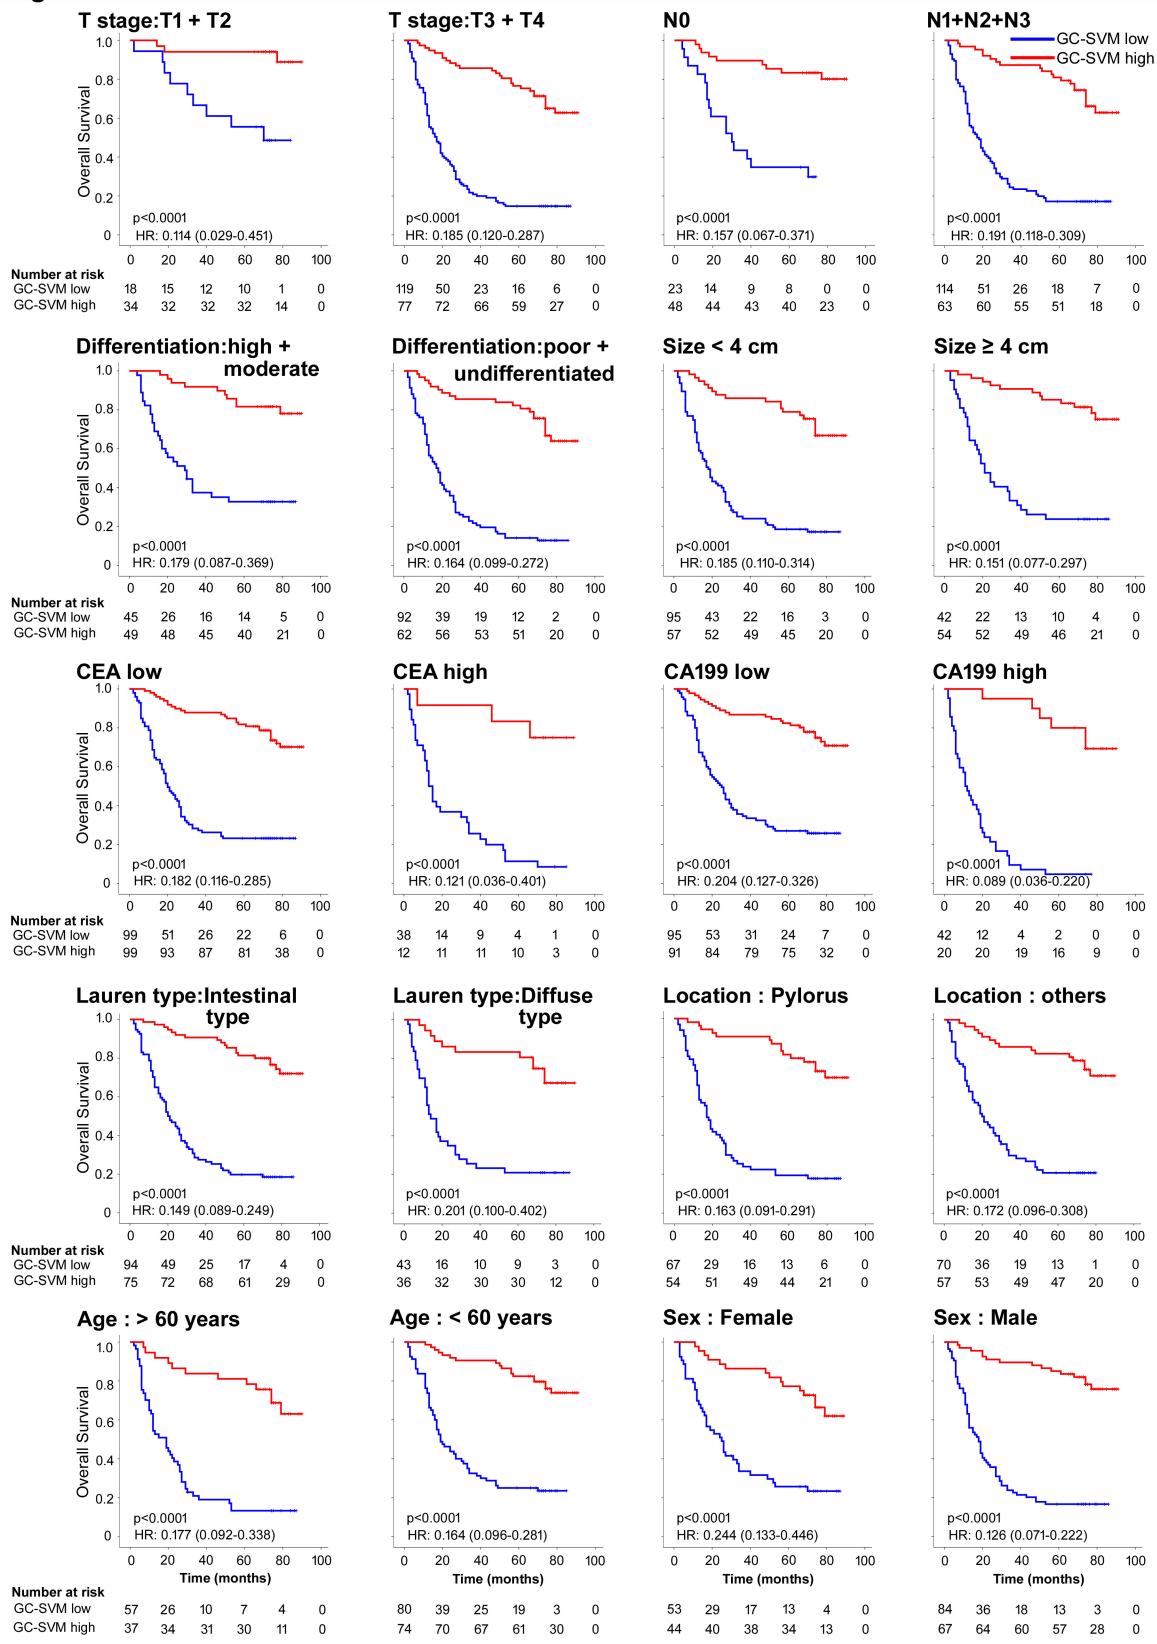

Supplement: Supplementary file 1 [file 39921392]
